1 **Nonspecific Cleavages Arising from Reconstitution of Trypsin under Mildly Acidic**

2 **Conditions**

3 Ben Niu\*, Michael Martinelli II, Yang Jiao, Eric Meinke<sup>a</sup>, Mingyan Cao, Jihong Wang<sup>b</sup>

4

5 Department of Analytical Sciences, BioPharmaceuticals R&D, AstraZeneca, Gaithersburg,

6 MD, USA

7

8 <sup>a</sup>Current affiliation: AveXis, Longmont, CO, USA

9 <sup>b</sup>Current affiliation: Viela Bio, Gaithersburg, MD, USA

10

11 \*Corresponding author:

12 Ben Niu

13 AstraZeneca

14 One Medimmune Way, Gaithersburg, MD 20878, USA

15 E-mail: [ben.niu1@astrazeneca.com](mailto:ben.niu1@astrazeneca.com)

16

17 **Short title:** Trypsin Nonspecific Cleavages from Mildly Acidic Reconstitution and Storage

## 18 **Abstract**

19 Tryptic digestion of proteins followed by liquid chromatography with tandem mass  
20 spectrometry analysis is an extensively used approach in proteomics research and  
21 biopharmaceutical product characterization, owing to the high level of cleavage fidelity  
22 produced with this technique. However, nonspecific trypsin cleavages have been frequently  
23 reported and shown to be related to a number of digestion conditions and predigestion sample  
24 treatments. In this work, we reveal that, for a number of commercial trypsins, reconstitution  
25 and storage conditions can have a significant impact on the occurrence of trypsin nonspecific  
26 cleavages. We analyzed the tryptic digestion of a variety of biotherapeutics, using trypsins  
27 reconstituted under different conditions. The results indicate that, for many commercial  
28 trypsins, commonly recommended reconstitution/storage conditions (mildly acidic, e.g., 50  
29 mM acetic acid, 1 mM HCl) can actually promote nonspecific trypsin activities, which are  
30 time dependent and can be as high as 20% in total relative abundance. In contrast, using water  
31 for reconstitution and storage can effectively limit nonspecific cleavages to 1%. Interestingly,  
32 the performances of different commercial trypsins were found to be quite distinct in their  
33 levels of nonspecific cleavages and responses to the two reconstitution conditions. Our  
34 findings demonstrate the importance of choosing the appropriate trypsin for tryptic digestion  
35 and the necessity of assessing the impact of trypsin reconstitution and storage on nonspecific  
36 cleavages. We advocate for manufacturers of commercial trypsins to reevaluate manufacturing  
37 processes and reconstitution/storage conditions to provide good cleavage specificity.

38 [Abstract word count: 235 (300 max.)]

## 39 **Introduction**

40 Owing to its ready availability and high fidelity, trypsin is by far the most widely used  
41 proteolytic enzyme in mass spectrometry (MS)–based research and applications [1-6]. These  
42 applications rely on the ability of liquid chromatography (LC) with tandem mass spectrometry  
43 (LC-MS/MS) to identify and quantify various peptide species with a high degree of accuracy,  
44 sensitivity, and reproducibility. Studies using trypsin-based digestion processes, however,  
45 have often reported nontryptic activities, which generate semitryptic and nontryptic peptides  
46 through nonspecific cleavages (cleavages at residues other than Arg or Lys) [7-10]. Although  
47 the use of nonspecific cleavage products might contribute to improved protein sequence  
48 coverage and identification [11, 12], they are also accompanied by unexpected peptides in the  
49 tryptic digestion profile. These nontryptic cleavages disperse the signals of the specifically  
50 cleaved peptides that are available for detection and increase the database searching workload  
51 for a complex sample matrix, potentially affecting accurate identification [13, 14].

52 Tryptic digestion–based peptide mapping is commonly used in the biopharmaceutical industry  
53 to quantitate posttranslational modifications (PTMs) of a biotherapeutic, to provide identity  
54 confirmation, and to evaluate purity [15, 16]. The unpredictable emergence of nontryptic  
55 cleavages can pose great challenges to achieving assay fidelity and reproducibility. The  
56 implementation of multi-attribute method (MAM) analysis, a more recent elaboration from  
57 tryptic peptide mapping [16-18], can also be affected, owing to the introduction of new peaks  
58 into, or removal of peaks from, the chromatographic profile. It is therefore critical to minimize  
59 nontryptic activities during trypsin-involved digestion processes.

60 Nontryptic activities typically indicate the presence of proteases other than trypsin, such as  
61 chymotrypsin contamination [19]. However, most commercial trypsins have been treated with  
62 *N-p*-tosyl-L-phenylalanyl chloromethyl ketone (TPCK) during the manufacturing process to  
63 remove traces of chymotrypsin [20]. In addition, studies have shown that trypsin cleavage  
64 specificity can be affected by a number of experimental conditions, including temperature,  
65 pH, enzyme-to-substrate ratio, and duration [7, 10, 21]. The variable quality of commercial  
66 trypsins can also have a great impact on cleavage specificity [22, 23]. In this study, however,  
67 we report that trypsin reconstitution and storage conditions alone can have a significant impact  
68 on the extent of nonspecific trypsin cleavages.

69 Herein we demonstrate that the reconstitution of several commercial trypsins in mildly acidic  
70 conditions (50 mM acetic acid or 1 mM HCl) can lead to dramatically increased nontryptic  
71 activities, giving rise to numerous semitryptic and nontryptic peptides. More important,  
72 although these reconstitution and storage conditions are recommended by manufacturers, the  
73 extent of nontryptic activities increases as a function of reconstitution and storage time and  
74 could be minimized for some trypsins if reconstituted and/or stored in water. To elucidate  
75 cleavage preferences for nontryptic activities, we used new peak detection (NPD) analysis to  
76 detect and identify semitryptic and nontryptic peptides and characterized the residues  
77 accountable for compromised cleavage specificity. Our work demonstrates the impact of  
78 mildly acidic reconstitution and storage conditions on nonspecific trypsin cleavages and  
79 reveals that, for several commercial trypsins, such conditions are inappropriate for trypsin  
80 reconstitution and storage. Although the integrity of the digestion profile may be  
81 compromised because of reconstitution and/or storage conditions, some trypsins manifested  
82 better specificity than others. Given these largely variable trypsin specificities, we show the

83 necessity of assessing nonspecific cleavages, and identify several diagnostic peptides from  
84 NISTmAb digests that can be used for quick evaluation of the extent of nonspecific cleavages.  
85 We recommend that manufacturers of commercial trypsins reevaluate manufacturing  
86 processes and reconstitution/storage conditions for improved trypsin cleavage specificity.

## 87 **Materials and Methods**

### 88 **Materials and chemicals**

89 All biologics were produced and purified at AstraZeneca (Gaithersburg, MD) and were stored  
90 at  $-80^{\circ}\text{C}$  at pH  $\sim 6.0$  before use. Unless noted otherwise, trypsin was purchased from Promega  
91 (V5280; Madison, WI) and is denoted as Trypsin-1. Seven other trypsins were used and are  
92 denoted as Trypsin-2 (V5111; Promega), Trypsin-3 (786-254; G-Biosciences), Trypsin-4  
93 (786-254B; G-Biosciences), Trypsin-5 (EN-151; Princeton Separations), Trypsin-6  
94 (11418025001; Roche), Trypsin-7 (90057; Pierce), and Trypsin-8 (T-6567; Sigma-Aldrich).  
95 Guanidium hydrochloride solution (8 M concentration), iodoacetamide (IAM), dithiothreitol,  
96 and hydrochloric acid microdialysis cassettes and devices (10 K MWCO) were purchased  
97 from Thermo Fisher Scientific (Waltham, MA). Urea powder was purchased from GE  
98 Healthcare Life Sciences (Chicago, IL). Tris HCl buffers were purchased from G-Biosciences.  
99 Acetic acid and trifluoroacetic acid (TFA) were purchased from Sigma. High-performance  
100 liquid chromatography (HPLC)–grade water and acetonitrile were purchased from Honeywell  
101 (Muskegon, MI).

### 102 **Sample preparation**

103 Protein samples in formulation were diluted to 5.0 mg/mL with HPLC-grade water and  
104 denatured with 8.0 M guanidine HCl. Disulfide bonds were reduced with 30 mM dithiothreitol  
105 for 30 min at 37°C, followed by alkylation of free thiols with 70 mM IAM for 30 min at room  
106 temperature in the dark. Buffer exchange was conducted with microdialysis cassettes  
107 according to the manufacturer's recommendations. Samples were buffer exchanged to a  
108 solution containing 2 M urea, 150 mM Tris at pH 7.4 for tryptic digestion.

### 109 **Tryptic digestion**

110 All trypsins were stored in lyophilized form at temperatures recommended by the  
111 manufacturers and were brought to room temperature before use. Trypsins were reconstituted  
112 to 0.67 mg/mL with different solvents (HPLC-grade water, 1 mM HCl, 50 mM acetic acid)  
113 and held at different temperatures for various periods as needed before being used for  
114 digestion with a mass ratio of 1:12 (trypsin:protein). The digestion was incubated at 37°C for  
115 3.5 h before being quenched by the addition of 1% TFA.

### 116 **LC-MS/MS**

117 For LC-MS/MS, mobile phase A consisted of 0.02% TFA in HPLC-grade water and mobile  
118 phase B consisted of 0.02% TFA in HPLC-grade acetonitrile. Six micrograms of digest was  
119 loaded onto an Acquity BEH reversed-phase C18 column (130  $\mu$ m, 1.7  $\mu$ m, 2.1  $\times$  150 mm;  
120 Waters, Milford, MA). The LC was operated at a flow rate of 0.2 mL/min, with the column  
121 temperature kept at 55°C during separation and the autosampler temperature at 6°C. Total run  
122 time per sample was 90 min.

123 A Q Exactive HF-X mass spectrometer (Thermo Fisher Scientific), operated in positive  
124 polarity mode, was used for mass detection. The scan range of precursor ions was set at 250–  
125 2,000 m/z for all samples, with a high mass resolving power of 120,000. Data acquisition was  
126 performed in top 5 data-dependent acquisition mode, in which the five most abundant  
127 precursor ions corresponding to peptide elution per scan were subjected to higher-energy C-  
128 trap dissociation (HCD) in the HCD cell to obtain product-ion mass spectra. The normalized  
129 collision energy was set to 35% of maximum. Dynamic exclusion was activated for 8 s after  
130 each scan to enable MS/MS fragmentation of lower-abundance peptides. The maximum  
131 injection time was set to 150 ms for a full mass spectral scan and to 50 ms for each MS/MS  
132 scan.

### 133 **Database searching**

134 Raw data files were subjected to database searching with Byos (Protein Metrics, San Carlos,  
135 CA) against the amino acid sequences of corresponding biologics and reversed decoys of all  
136 possible peptides [24]. The searching parameters were set to include IAM alkylation as fixed  
137 modification for Cys-containing peptides and a number of common PTMs as variable  
138 modifications, including deamidation, oxidation, N-succinimide, D-succinimide, dioxidation,  
139 pyroglutamate formation, W-kynurenine formation, and amidated proline. The search  
140 tolerance window was set to 10 ppm for all precursor ions and to 50 ppm for product spectra.  
141 The C-termini of Arg and Lys were selected as fully specific cleavage sites, with missed  
142 cleavage tolerance as 3. For database searching of nonspecific cleavages, the digestion  
143 specificity was set to “nonspecific” with any number of missed cleavages.  
144 Relative levels of nonspecific cleavages were calculated as:

145 
$$\frac{\sum XICs \text{ of semitryptic peptides} + \sum XICs \text{ of nontryptic peptides}}{\sum XICs \text{ of all identified peptides}} \times 100\% \text{ (Eq. 1).}$$

146 Peptides that were identified as semitryptic or nontryptic but had retention times identical to  
147 those of their corresponding fully tryptic parent peptides were considered to be from in-source  
148 fragmentation and were not included in the calculation of relative levels of nonspecific  
149 cleavages [25].

## 150 **New peak detection analysis**

151 Progenesis QI software (Waters) with Byonic node was used for NPD analysis through binary  
152 comparison of the raw data. The absolute NPD intensity threshold was set to 1.0E6 units. The  
153 fold-change threshold, which is used to designate a peak as “new”, was set to threefold as  
154 minimum. The detected “new peaks” could be imported to Byonic (in .mgf format) for  
155 nonspecific cleavage database searching.

## 156 **Results and Discussion**

### 157 **Increased nonspecific cleavages with acidic reconstitution**

158 Most manufacturers recommend reconstituting lyophilized trypsin by using mildly acidic  
159 solutions (e.g., 50 mM acetic acid or 1 mM HCl) to sustain tryptic activities and inhibit  
160 autolysis during storage before reuse. Trypsin-1 was reconstituted in 50 mM acetic acid  
161 (termed “condition 1”) prior to digestion and the outcome was compared with that of trypsin  
162 reconstituted in HPLC-grade water (termed “condition 2”). Results showed that the digestion  
163 profiles, as represented by UV and/or total ion chromatograms (TICs), were noticeably  
164 different; multiple new peaks arose in condition 1, indicating the presence of new peptides.



165 To illustrate, reference material of monoclonal antibody A (mAb-A) were subjected to the  
166 tryptic digestion protocol, using identical trypsins but different reconstitution conditions. One  
167 trypsin was reconstituted in 50 mM acetic acid (condition 1), and the other was reconstituted  
168 in HPLC-grade water (condition 2). UV chromatograms of both digestions are shown in Fig  
169 1A. The major UV peaks observed in condition 2 corresponded to the fully tryptic mAb-A  
170 heavy-chain and light-chain peptides, with a few minor peaks associated with trypsin autolysis  
171 (denoted with asterisks in Fig 1A). However, the digestion profile in condition 1 differed; in  
172 addition to the fully tryptic peptides, numerous new, chromatographically separated peaks  
173 were observed (Fig 1A, bottom panel). Some of these new peaks had intense UV signals, such  
174 as those annotated as H9 $\alpha$ , L13 $\alpha$ , L13 $\beta$ , and H14 $\gamma$  in Fig 1. These peaks, however, were not  
175 identified as mAb-A peptides in the original database searching until nonspecific-cleavages  
176 rules were applied.

177 **Fig 1.** (A) Butterfly plot of UV chromatograms of mAb-A digested with Trypsin-1  
178 reconstituted in HPLC-grade water and 50 mM acetic acid. Tryptic peptides are  
179 denoted using single letters (H = heavy chain; L = light chain) followed by the  
180 corresponding peptide number. Semitryptic and nontryptic peptides are denoted using  
181 the corresponding fully tryptic peptides that encompass their sequences, followed by  
182 Greek letters. Peaks annotated with asterisks are from autolysis. (B) Extracted ion  
183 chromatograms (XICs) of peptide H4 and the semitryptic peptides H4 $\alpha$ , H4 $\beta$ , and H4 $\gamma$ .  
184 The abundances of semitryptic species were significantly higher when acetic acid was  
185 used for reconstitution. (C) UV peak integrals representing peptide H4 and the  
186 corresponding semitryptic peptides H4 $\alpha$ , H4 $\beta$ , and H4 $\gamma$  showed that the sum of

187 integrals between the two conditions were similar; however, H4 $\alpha$ , H4 $\beta$ , and H4 $\gamma$   
188 emerged in the acetic acid condition, at the cost of H4 signals.

189 Characterizations based on the MS/MS spectra indicated that these newly emerged peaks  
190 corresponded to semitryptic and nontryptic peptides of mAb-A. For instance, in addition to the  
191 CH1 domain H14 peptide (amino acid 153–201 with no missed cleavages), which eluted at  
192 63.8 min, we also identified peptides H14 $\alpha$ , H14 $\beta$ , and H14 $\gamma$ , all of which carried nontryptic  
193 cleavages. H14 $\gamma$  (peptide 153–185) and H14 $\beta$  (peptide 186–201) were the two semitryptic  
194 counterparts that formed H14 via cleavage at Y185, whereas H14 $\alpha$  (peptide 164–185) was a  
195 nontryptic peptide generated by simultaneous cleavages at W163 and Y185 (Fig 1A). The  
196 intensity of H14 $\gamma$  in condition 1 was nearly comparable to that of H14, indicating a strong  
197 preference to cleave at Y185 for this particular peptide when Trypsin-1 was reconstituted in  
198 50 mM acetic acid instead of water. There were, however, many other peptides with  
199 adventitious, nonspecific cleavages. For example, the extracted ion chromatograms (XICs) of  
200 H4 and the corresponding peptides from nontryptic cleavages (H4 $\alpha$ , H4 $\beta$ , H4 $\gamma$ ) in both  
201 condition 1 and condition 2 (Fig 1B) demonstrated dramatic differences in signal abundances,  
202 such that peptides H4 $\alpha$ , H4 $\beta$ , and H4 $\gamma$ , the signals of which were negligible in condition 2,  
203 grew significantly in condition 1. Interestingly, the signal of H4 decreased in condition 1  
204 compared with condition 2, owing to the high yield of nontryptic cleavages. The UV peak  
205 areas of these peptides indicated an abundance decrease of ~60% for H4, with H4 $\alpha$ , H4 $\beta$ , and  
206 H4 $\gamma$  emerging as new species in condition 1 (Fig 1C).

207 The incidence and extent of adventitious, nonspecific cleavages increased when Trypsin-1  
208 was reconstituted in 50 mM acetic acid, producing more peaks in the chromatographic profile.  
209 Therefore, we further annotated the UV chromatogram to denote the visible new peaks

210 (characterized as semitryptic and/or nontryptic peptides) by their corresponding fully tryptic  
211 peptides that encompass these sequences, using Greek letters in alphabetic order ( $\alpha$ ,  $\beta$ ,  $\gamma$ , etc.;  
212 Fig 1A, bottom panel). Although it is noteworthy that all trypsins generated a certain amount  
213 of semitryptic and/or nontryptic cleavages [22, 26, 27], we observed that these adventitious,  
214 nonspecific cleavages increased markedly only when Trypsin-1 was reconstituted in a mildly  
215 acidic environment prior to digestion. The same phenomenon was repeated by using Trypsin-1  
216 reconstituted in 1 mM HCl instead of 50 mM acetic acid (Supplementary Fig S1).

217 Our results indicate that acidic reconstitution of Trypsin-1 can significantly affect subsequent  
218 tryptic digestion by generating a greater extent of adventitious, nonspecific cleavages. In  
219 addition to antibodies, other molecule modalities, ranging from small proteins to adeno-  
220 associated virus (AAV) capsid proteins, were also accompanied by significant appearances of  
221 new peaks, owing to increased nontryptic activities induced by acidic reconstitution. Fig S2A  
222 shows tryptic digestion profiles (as TICs) of a 17-kDa protein with Trypsin-1 resuspended in  
223 HPLC-grade water and 1 mM HCl. The two visible new peaks in the 1 mM HCl condition  
224 were identified as peptide 30–48 and peptide 91–110, which resulted from W48 and Tyr110  
225 cleavages, respectively.

### 226 **Time-dependent nontryptic activities**

227 We found that the extent of the nontryptic activities induced by acidic reconstitution of  
228 Trypsin-1 increased with the length of the reconstitution period. Interestingly, when water was  
229 used for reconstitution, the level of nontryptic activities remained low.

230 As an example, samples of NISTmAb (an IgG1 antibody) were subjected to a 3.5-h tryptic  
231 digestion with Trypsin-1 reconstituted in 50 mM acetic acid at room temperature for five

232 different time periods:  $t_0$ , 1 h, 2 h, 4 h, and 6 h, where  $t_0$  corresponds to the immediate use of  
233 trypsin for digestion after dissolving. The control was Trypsin-1 reconstituted in HPLC-grade  
234 water at room temperature for the same periods.

235 To evaluate nontryptic activities as a function of trypsin reconstitution time, we monitored the  
236 signals of four NISTmAb semitryptic peptides, namely, heavy chain 151–183 and 184–213 as  
237 obtained from the cleavage at heavy chain Tyr183, light chain 61-86, and 87-102, as obtained  
238 from the cleavage at light chain Tyr 86, and their corresponding fully tryptic peptides, heavy  
239 chain 151–213 and light chain 61–102. We show in Fig 2A and 2B, using semitryptic peptide  
240 heavy chain 151-183 as an example, that the signal of this peptide markedly increased from  $t_0$   
241 to 4 h with reconstitution in 50 mM acetic acid. The XIC of each peptide at each time point  
242 was extracted using monoisotopic mass, and the XIC integrals were plotted as a function of  
243 reconstitution time under the two reconstitution conditions (Fig 2C). For reconstitution with  
244 50 mM acetic acid, an uptrend of XIC areas were seen for all four semitryptic peptides,  
245 whereas a downtrend was observed for the corresponding fully tryptic peptides. These  
246 observations strongly suggest that the increased abundances of semitryptic peptides occurred  
247 at the cost of fully tryptic peptide signals with a longer reconstitution time in acid. In contrast,  
248 with water reconstitution, the XIC areas of both semitryptic and fully tryptic peptides  
249 remained unchanged. It is noteworthy that the level of nontryptic activities remained low  
250 throughout the 6-h reconstitution period, as evidenced by the low abundance of all semitryptic  
251 peptides when water was used for reconstitution (Fig 2C).

252 The abundances of the four monitored NISTmAb semitryptic peptides relative to their  
253 corresponding fully tryptic peptides are shown in Fig 2D. Time-dependent increases were  
254 observed with acidic reconstitution, and markedly lower relative abundances were found with

255 water reconstitution. Taking heavy chain peptide 184-213 as example, the time-dependence of  
256 its relative abundance reported 30% at t0 and grew to 80% with 6-h reconstitution in acetic  
257 acid; whereas the relative abundance was stable around 10% throughout the reconstitution  
258 period in water. These results demonstrate that the abundances of these peptides are sensitive  
259 to different reconstitution conditions and that their relative abundances might serve as  
260 indicators of the extent of nonspecific cleavages. A pre-run of NISTmAb tryptic digestion  
261 with monitoring of relative abundances of these diagnostic peptides prior to running  
262 experiment samples should provide a quick evaluation of nontryptic activities.

263 **Fig 2.** (A) XICs of NISTmAb peptide heavy chain 151–183 by monoisotopic mass  
264 (m/z 1763.8582) showed increased intensity with reconstitution in 50 mM acetic acid  
265 compared with reconstitution in water. The difference in XIC intensity between the  
266 two reconstitution conditions was more pronounced with the 4-h reconstitution period.  
267 (B) Precursor-ion spectrum of NISTmAb peptide heavy chain 151–183 ( $z = 2$ ), a  
268 semitryptic peptide generated from nontryptic cleavage at Y183. (C) When 50 mM  
269 acetic acid was used for Trypsin-1 reconstitution, all four semitryptic peptides showed  
270 increasing abundances with longer reconstitution times of up to 6 h, and the  
271 corresponding two fully tryptic peptides showed decreasing abundances. With water as  
272 the reconstitution condition, the abundances of all peptides remained unchanged, and  
273 those of the four semitryptic peptides were consistently low. (D) Abundances of the  
274 four semitryptic peptides relative to their corresponding fully tryptic peptides as a  
275 function of length of reconstitution period. Orange horizontal line indicates the  
276 corresponding averaged relative abundances of each peptide with reconstitution in  
277 water.

278 These results suggest that, although the recommended reconstitution solution for Trypsin-1 is  
279 50 mM acetic acid, nonspecific cleavages occurred under this condition and progressed as a  
280 function of the length of the reconstitution period. In contrast, using water for reconstitution  
281 resulted in reproducible tryptic performance with minimal nontryptic activities.

## 282 **Implementation of NPD**

283 NPD, an indispensable component of the multi-attribute method (MAM) that debuted in 2015,  
284 is an emerging approach for nontargeted purity testing via binary comparison between a  
285 reference sample and an unknown [16, 17]. The use of advanced software algorithms to  
286 automatically align the chromatograms and identify any new peaks in the samples according  
287 to predefined peak selection criteria can have significant advantages over visual inspection of  
288 the profiles, especially when new peaks co-elute with an existing peak or the visible baseline  
289 starts to interfere with the profile of new peaks. We used NPD to capture the “changed” peaks,  
290 which were then subjected to extensive database searching with nonspecific cleavage rules  
291 and any number of missed cleavages. In doing so, we sought to leverage the identification of  
292 peptides induced by nontryptic cleavages due to acidic resuspension in order to generalize the  
293 altered tryptic cleavage pattern and understand the preferred sites for such nontryptic  
294 activities. Using NPD, we compared protein samples digested by Trypsin-1 reconstituted in  
295 acetic acid with the samples digested by Trypsin-1 reconstituted in HPLC-grade water.

296 As an example, in a binary comparison of NISTmAb tryptic digestion with Trypsin-1  
297 reconstituted in 50 mM acetic acid for 6 h (test sample) and Trypsin-1 reconstituted in water  
298 (reference), a total of 121 species were designated as “new peaks” (Fig S3A). Some of these  
299 species were deconvoluted to identical masses and retention times, indicating that they had

300 different charge states (and therefore different  $m/z$  values) attributed to the same peptide. A  
 301 total of 58 masses were deconvoluted from the 121 species, and roughly 50% of these masses  
 302 were in the range of 1,200–1,800 Da (Fig S3B). Characterizations of the 58 peptide species  
 303 identified 52 semitryptic and 6 nontryptic NISTmAb peptides (Table 1). For each peptide, the  
 304 fold-change value in abundance from the reference to the test sample (plotted in Fig S4) was  
 305 calculated as:

$$306 \quad \text{fold-change value of peptide } i = \frac{\sum XICs \text{ of peptide } i_{50 \text{ mM acetic acid}}}{\sum XICs \text{ of peptide } i_{\text{water}}} . \quad (\text{Eq. 2})$$

307 All peptides demonstrated significant fold-change values ( $>3$ ), consistent with the increased  
 308 extent of nonspecific cleavages with the use of Trypsin-1 with acidic reconstitution. The fold-  
 309 change values for semitryptic peptides ranged from 3 to 25, with a median of approximately  
 310 15, whereas those for nontryptic peptides were markedly higher, ranging from 100 to 300.  
 311 These significant fold-change values indicate a considerable shift of Trypsin-1 cleavage  
 312 specificity from highly tryptic (cleavages at R, K) to inclusion of some nontryptic sites.

313 **Table 1.** Identification of 6 nontryptic and 52 semitryptic NISTmAb peptides with  
 314 their corresponding sequences, elution times, and  $m/z$  (charge)

| Cleavage   | Chain | Peptide | Sequence                   | RT (min) | $m/z$ (charge) |
|------------|-------|---------|----------------------------|----------|----------------|
|            |       | 28–38   | SLSTAGMSVGW                | 37.0     | 1095.5138 (+1) |
| Nontryptic | Heavy | 162–183 | NSGALTSGVHTFPAVLQS<br>SGLY | 47.2     | 1103.5613 (+2) |
|            |       | 184–201 | SLSSVVTVPSSSLGTQTY         | 37.2     | 906.9647 (+2)  |
|            |       | 71–86   | TLTISSLQPDDFATYY           | 47.8     | 917.9414 (+2)  |
|            | Light | 86–95   | YCFQGSYYPF                 | 36.3     | 1225.4990 (+1) |

| Cleavage    | Chain | Peptide | Sequence                              | RT (min) | <i>m/z</i> (charge)                                |
|-------------|-------|---------|---------------------------------------|----------|----------------------------------------------------|
|             |       | 87–95   | CFQGSGYPF                             | 32.4     | 1062.4354 (+1),<br>531.7214 (+2)                   |
|             |       | 6–18    | ESGPALVKPTQTL                         | 30.0     | 1340.7430 (+1),<br>670.8743 (+2)                   |
|             |       | 6–24    | ESGPALVKPTQTLTLTCT<br>F               | 44.2     | 1032.5341 (+2),<br>688.6931 (+3)                   |
|             |       | 6–27    | ESGPALVKPTQTLTLTCT<br>FSGF            | 49.8     | 1178.0945 (+2),<br>785.7338 (+3)                   |
|             |       | 6–38    | ESGPALVKPTQTLTLTCT<br>FSGFSLSTAGMSVGW | 60.9     | 1716.3461 (+2),<br>1144.5663 (+3)                  |
|             |       | 25–40   | SGFSLSTAGMSVGWIR                      | 48.2     | 1655.8196 (+1),<br>828.4121 (+2),<br>552.6110 (+3) |
|             |       | 28–40   | SLSTAGMSVGWIR                         | 39.6     | 1364.6995 (+1),<br>682.8528 (+2),<br>455.5711 (+3) |
| Semitryptic | Heavy | 39–45   | IRQPPGK                               | 11.0     | 795.4828 (+1),<br>398.2450 (+2)                    |
|             |       | 46–55   | ALEWLADIWW                            | 19.6     | 1302.6418 (+1),<br>651.8240 (+2),<br>434.8851 (+3) |
|             |       | 84–95   | VTNMDPADTATY                          | 24.1     | 1298.5563 (+1),<br>649.7821 (+2)                   |
|             |       | 84–96   | VTNMDPADTATYY                         | 27.9     | 1461.6192 (+1),<br>731.3139 (+2)                   |
|             |       | 96–99   | YCAR                                  | 9.1      | 569.2501 (+1),<br>285.1286 (+2)                    |
|             |       | 106–124 | YFDVWGQGTTVTVSSAS<br>TK               | 37.5     | 1017.4943 (+2)                                     |
|             |       | 151–161 | DYFPEPVTVSW                           | 47.5     | 1339.6217 (+1),<br>670.3137 (+2)                   |



| Cleavage | Chain | Peptide | Sequence                                                     | RT (min) | <i>m/z</i> (charge)                                                  |
|----------|-------|---------|--------------------------------------------------------------|----------|----------------------------------------------------------------------|
|          |       | 151–183 | DYFPEPVTVSWNSGALTS<br>GVHTFPAVLQSSGLY                        | 60.4     | 1763.8600 (+2),<br>1176.2424 (+3),<br>882.4336 (+4)                  |
|          |       | 151–201 | DYFPEPVTVSWNSGALTS<br>GVHTFPAVLQSSGLYSLS<br>SVVTVPSSSLGTQTY  | 66.0     | 1774.2085 (+3),<br>1330.9107 (+4),<br>1065.9287 (+5)                 |
|          |       | 162–213 | NSGALTSGVHTFPAVLQS<br>SGLYSLSSVVTVPSSSLGT<br>QTYICNVNHKPSNTK | 55.3     | 1798.2434 (+3),<br>1348.9343 (+4),<br>1079.3483 (+5)                 |
|          |       | 184–213 | SLSSVVTVPSSSLGTQTYI<br>CNVNHKPSNTK                           | 35.5     | 1603.3126 (+2),<br>1069.2094 (+3),<br>802.1594 (+4)                  |
|          |       | 184–216 | SLSSVVTVPSSSLGTQTYI<br>CNVNHKPSNTKVDK                        | 34.5     | 1774.4087 (+2),<br>1183.2745 (+3),<br>887.7074 (+4)                  |
|          |       | 202–213 | ICNVNHKPSNTK                                                 | 11.1     | 1411.7106 (+1),<br>706.3584 (+2),<br>471.2417 (+3),<br>353.6830 (+4) |
|          |       | 217–245 | RVEPKSCDKTHTCPPCPA<br>PELLGGPSVFL                            | 35.5     | 1625.2948 (+2),<br>1083.8637 (+3)                                    |
|          |       | 222–244 | SCDKTHTCPPCPAPPELLG<br>GPSVF                                 | 43.8     | 1264.0719 (+2),<br>843.0508 (+3)                                     |
|          |       | 226–244 | THTCPPCPAPPELLGGPSV<br>F                                     | 45.6     | 1018.9829 (+2),<br>679.6586 (+3)                                     |
|          |       | 245–251 | LFPPKPK                                                      | 21.4     | 826.5180 (+1),<br>413.7627 (+2),<br>276.1775 (+3)                    |
|          |       | 310–320 | TVLHQDWLNGK                                                  | 28.5     | 1310.6865 (+1),<br>655.8463 (+2),<br>437.5666 (+3)                   |
|          |       | 348–352 | EPQVY                                                        | 17.4     | 635.3033 (+1),<br>318.1553 (+2)                                      |

| Cleavage | Chain | Peptide | Sequence                               | RT (min) | <i>m/z</i> (charge)                                |
|----------|-------|---------|----------------------------------------|----------|----------------------------------------------------|
|          |       | 353–363 | TLPPSREEMTK                            | 17.9     | 1288.6549 (+1),<br>644.8307 (+2)                   |
|          |       | 396–408 | TTPPVLDSDGSFF                          | 44.0     | 1382.6441 (+1),<br>691.8267 (+2)                   |
|          |       | 396–410 | TTPPVLDSDGSFFLY                        | 51.3     | 1658.7946 (+1),<br>829.9006 (+2)                   |
|          |       | 409–412 | LYSK                                   | 10.2     | 510.2923 (+1)                                      |
|          |       | 420–426 | WQQGNVF                                | 29.4     | 878.4145 (+1),<br>439.7112 (+2)                    |
|          |       | 420–439 | WQQGNVFSCSVMHEAL<br>HNHY               | 37.0     | 1222.5369 (+2),<br>815.3601 (+3)                   |
|          |       | 427–442 | SCSVMHEALHNHYTQK                       | 21.1     | 1941.8709 (+1),<br>971.4370 (+2),<br>647.9609 (+3) |
|          |       | 29–34   | VGymHW                                 | 30.9     | 792.3498 (+1),<br>396.6786 (+2)                    |
|          |       | 29–35   | VGymHWY                                | 33.5     | 955.4126 (+1),<br>478.2100 (+2)                    |
|          |       | 35–41   | YQQKPGK                                | 9.2      | 848.4616 (+1),<br>424.7343 (+2)                    |
|          | Light | 35–44   | YQQKPGKAPK                             | 10.1     | 1144.6483 (+1),<br>572.8273 (+2)                   |
|          |       | 61–70   | FSGSGSGTEF                             | 22.3     | 975.4041 (+1)                                      |
|          |       | 61–85   | FSGSGSGTEFTLTISLQP<br>DDFATY           | 53.3     | 1314.6021 (+2),<br>876.7387 (+3)                   |
|          |       | 61–86   | FSGSGSGTEFTLTISLQP<br>DDFATYY          | 55.2     | 1396.1324 (+2),<br>931.0921 (+3)                   |
|          |       | 61–95   | FSGSGSGTEFTLTISLQP<br>DDFATYYCFQSGYYPF | 61.4     | 1917.8441 (+2),<br>1278.8977 (+3)                  |

| Cleavage | Chain | Peptide | Sequence                          | RT (min) | <i>m/z</i> (charge)                                |
|----------|-------|---------|-----------------------------------|----------|----------------------------------------------------|
|          |       | 86–102  | YCFQGSGYPFTFGGGTK                 | 39.1     | 1873.8233 (+1),<br>937.4132 (+2)                   |
|          |       | 87–102  | CFQGSGYPFTFGGGTK                  | 35.7     | 1710.7601 (+1),<br>855.8825 (+2),<br>570.9245 (+3) |
|          |       | 96–102  | TFGGGTK                           | 11.6     | 667.3405 (+1),<br>334.1739 (+2)                    |
|          |       | 108–115 | TVAAPSVF                          | 32.0     | 791.4288 (+1),<br>396.2183 (+2)                    |
|          |       | 116–125 | IFPPSDEQLK                        | 27.0     | 1173.6152 (+1),<br>587.3108 (+2)                   |
|          |       | 149–172 | VDNALQSGNSQESVTEQ<br>DSKDSTY      | 21.3     | 1301.5702 (+2),<br>868.0503 (+3)                   |
|          |       | 149–178 | VDNALQSGNSQESVTEQ<br>DSKDSTYSLSSL | 32.1     | 1595.7279 (+2),<br>1064.1545 (+3)                  |
|          |       | 169–172 | DSTY                              | 9.7      | 485.1877 (+1)                                      |
|          |       | 169–178 | DSTYSLSSL                         | 30.5     | 1073.4993 (+1),<br>537.2533 (+2)                   |
|          |       | 173–182 | SLSSTLTLSK                        | 28.0     | 1036.5891 (+1),<br>518.7982 (+2)                   |
|          |       | 175–182 | SSTLTLSK                          | 28.0     | 836.4731 (+1)                                      |
|          |       | 192–206 | ACEVTHQGLSSPVTK                   | 20.9     | 1613.7978 (+1),<br>807.4016 (+2),<br>538.6037 (+3) |

315 RT = retention time.

316 With the registration of masses and elution times of NISTmAb nontryptic and semitryptic  
317 peptides by NPD analysis, we were able to provide a coarse-grained evaluation of the overall  
318 extent of nonspecific cleavages of Trypsin-1 as a function of reconstitution time. The XICs of  
319 the 58 NISTmAb peptides (52 semitryptic, 6 nontryptic) in each condition were summed

320 together and divided by the XIC integrals of all identified peptides (per Eq. 1), giving the total  
321 fraction of peptides generated by nontryptic cleavages. With 50 mM acetic acid for Trypsin-1  
322 reconstitution, the overall extent of nonspecific cleavages started at ~3.5% and further  
323 increased, at a rate of approximately 2.9% per hour, to as high as 22% when reconstitution  
324 reached 6 h in 50 mM acetic acid. The use of 1 mM HCl for reconstitution rendered a  
325 comparable extent of nonspecific cleavages (data not shown). In contrast, reconstitution in  
326 HPLC-grade water effectively inhibited the increase of nonspecific cleavages, the overall  
327 extent of which was consistently approximately 1% (Fig 3A). In addition to nonspecific  
328 cleavages, we also assessed the extent of missed cleavages, which ranged from 4% to 7% for  
329 all conditions (Fig S5A).

330 **Fig 3.** (A) Level of nonspecific cleavages as represented by the sum of XICs of the 52  
331 NISTmAb semitryptic peptides and 6 nontryptic peptides relative to the sum of total  
332 identified peptides XICs as a function of trypsin resuspension time at room  
333 temperature (20°C). Dramatic differences were observed between the two conditions  
334 (i.e., 50 mM acetic acid and water); reconstitution in the acidic condition caused more  
335 nontryptic cleavages, the extent of which increased with longer reconstitution times. In  
336 contrast, the level of nonspecific cleavages remained consistent at approximately 1%  
337 with reconstitution of trypsin in water. (B) Evaluation of level of Trypsin-1  
338 nonspecific cleavages under the recommended storage condition, with trypsin  
339 reconstituted in 50 mM acetic acid and stored at -80 °C for different periods, versus  
340 the storage condition using water for reconstitution. The yield of nonspecific cleavages  
341 under the recommended storage condition (50 mM acetic acid) was significantly  
342 higher and increased with the length of the storage period. (C) Demographic profile of

343 amino acids involved in the semitryptic and nontryptic cleavages, based on 220  
344 semitryptic peptides and 34 nontryptic peptides involving five biotherapeutic samples  
345 in addition to NISTmAb.

### 346 **Recommended storage conditions**

347 The common recommendation for storing trypsins is in mildly acidic solution (e.g., 50 mM  
348 acetic acid) at low temperature. We investigated two sets of NISTmAb tryptic digestions,  
349 using Trypsin-1 reconstituted in HPLC-grade water and in 50 mM acetic acid. The trypsins  
350 were stored at  $-80^{\circ}\text{C}$  for different periods before use (t<sub>0</sub> and 2, 14, and 60 days). When the  
351 60-day storage condition recommended by the vendor was used, the NISTmAb digests  
352 obtained from Trypsin-1 reconstituted in acetic acid had 15% total nonspecific cleavages. This  
353 was a noticeably higher level than that of digests obtained from Trypsin-1 reconstituted in  
354 water, which were consistently low (~1% of nonspecific cleavages) (Fig 3B). These results  
355 suggest a dramatically lower rate of increase in overall nontryptic activities when trypsin was  
356 subjected to low temperature with acidic reconstitution. However, the data also suggest that  
357 the low-temperature storage condition with Trypsin-1 reconstituted in water should be the  
358 optimal long-term storage condition with which to maintain the desired performance of  
359 trypsin, as evidenced by the minimal level of nonspecific cleavages. We did not observe an  
360 increase in the extent of missed cleavages during the long-term storage of Trypsin-1 (Figure  
361 S5B). Moreover, no impact on sequence coverage or PTM quantitation was observed for  
362 trypsin subjected to long-term storage and reconstitution in water (data not shown).

### 363 **Demographic profile**

364 To populate the pool of semitryptic and nontryptic peptides caused by acidic reconstitution  
365 and/or storage of trypsin, NPD analysis of other biologics was performed. An investigation of  
366 preferred nonspecific cleavage sites was based on 220 semitryptic peptides and 34 nontryptic  
367 peptides, using five additional biotherapeutic samples besides NISTmAb. The demographic  
368 display of nonspecific cleavage sites based on these peptides indicated that four amino acids  
369 were accountable, namely, Tyr, Phe, Trp, and Leu. Approximately 90% of these cleavages  
370 occurred at the C-terminal of aromatic residues Tyr, Phe, and Trp, whereas Leu accounted for  
371 the remaining 10% (Figure 3B). This observation suggests that acidic reconstitution of  
372 Trypsin-1 leads to a shift in specificity, from highly specific for Lys and Arg to other amino  
373 acids, including Tyr, Phe, Trp, and Leu.

#### 374 **Different vendors, different quality**

375 In addition to Trypsin-1, we tested seven other commercial trypsins (Table 2) and assessed the  
376 extent of nontryptic activities and the effects of different reconstitution conditions.  
377 Lyophilized trypsin from each vendor was reconstituted in HPLC-grade water and in 50 mM  
378 acetic acid and kept at room temperature for 4 h before digestion of NISTmAb. The four  
379 diagnostic NISTmAb semitryptic peptides (heavy chain 151–183 and 184–213 and light chain  
380 61–86 and 87–102) and the corresponding fully tryptic peptides (heavy chain 151–213 and  
381 light chain 61–102) were employed. The relative abundance of each peptide was calculated as  
382 the ratio of its XIC integral over its summed XIC integrals and the corresponding fully tryptic  
383 peptides. The results of all eight trypsins are summarized in Figure 4.

384 **Table 2.** Overview of the eight commercial trypsins

| Name      | Vendor                | Catalog no. | Source  | Recommended Reconstitution* |
|-----------|-----------------------|-------------|---------|-----------------------------|
| Trypsin-1 | Promega               | V5280       | Porcine | 50 mM acetic acid           |
| Trypsin-2 | Promega               | V5111       | Porcine | 50 mM acetic acid           |
| Trypsin-3 | G-Biosciences         | 786-245     | Porcine | 50 mM acetic acid           |
| Trypsin-4 | G-Biosciences         | 786-245B    | Bovine  | 50 mM acetic acid           |
| Trypsin-5 | Princeton Separations | EN-151      | Porcine | Water                       |
| Trypsin-6 | Roche                 | 11418025001 | Bovine  | 1% acetic acid or 1 mM HCl  |
| Trypsin-7 | Pierce                | 90057       | Porcine | 50 mM acetic acid           |
| Trypsin-8 | Sigma                 | T-6567      | Porcine | 1 mM HCl                    |

385 \*Recommended reconstitution condition is based on product instruction of each trypsin

386 **Fig 4.** Relative abundance of selected NISTmAb semitryptic peptides for evaluation of  
387 nonspecific cleavages. Shown are (A) heavy chain 151–183, (B) heavy chain 184–213,  
388 (C) light chain 61-86, and (D) light chain 87–102, as generated from tryptic digestion  
389 with eight commercial trypsins (Trypsin-1 to Trypsin-8). Each trypsin was  
390 reconstituted in 50 mM acetic acid (white bar) and HPLC-grade water (gray bar) at  
391 room temperature for 4 h before immediate use for digestion.

392 According to the manufacturers' product information, all eight trypsins had been pretreated  
393 with TPCK and chemically modified and were claimed to afford high specificity.  
394 Nevertheless, the level of nonspecific cleavages and the responses to the two reconstitution  
395 conditions by each trypsin were noticeably different. Trypsin-2 and Trypsin-7, much like  
396 Trypsin-1, showed an increased extent of nonspecific cleavages under the acetic acid  
397 reconstitution condition, but the level could be minimized by using water for reconstitution;  
398 although for these three trypsins, the vendors' recommended reconstitution solvent is 50 mM

399 acetic acid (Table 2). Nevertheless, not all trypsins were responsive to the different  
400 reconstitution conditions. Trypsin-3, Trypsin-4, and Trypsin-5 each showed comparable  
401 extents of nonspecific cleavages between the two reconstitution conditions, but the high  
402 percentage of semitryptic peptides indicated undesirable specificity regardless of the  
403 reconstitution condition. Two trypsins (Trypsin-6 and Trypsin-8) showed high specificity and  
404 consistently low levels of nonspecific cleavages under both reconstitution conditions. In  
405 addition, the results revealed the differing fidelity of trypsins from different manufacturers,  
406 which play a pivotal role in the distinct levels of specificity and responses to different  
407 reconstitution conditions.

#### 408 **Possible causes of nontryptic activities**

409 Our results suggest that different processes used for manufacturing of trypsins were  
410 accountable for the diverse nontryptic activities we observed, as trypsins from some vendors  
411 showed better specificity and tolerance to acidic reconstitution conditions than others. The  
412 observed nonspecific cleavages were unlikely to be due to chymotrypsin contamination,  
413 owing to the significant increase in the extent of nonspecific cleavages and their time  
414 dependence only when trypsin was subjected to acidic reconstitution. However, other  
415 contaminants from purification and chemical treatments might be possible. Another cause  
416 could be the formation of pseudotrypsin ( $\psi$ -trypsin), a known variant of trypsin generated  
417 from the bond opening between K176 and D177 following an interchain split between K131  
418 and S132 that yields  $\alpha$ -trypsin [28, 29]. Coincident with our observations, pseudotrypsin also  
419 demonstrated a preference of cleavages after aromatic residues (Tyr, Phe, Trp) in addition to  
420 having characteristic trypsin properties [14, 30].



## 421 **Conclusions**

422 Our results, with focuses on Trypsin-1, reveal a significantly increased level of nonspecific  
423 cleavages during the trypsin digestion process when trypsin is reconstituted or stored in a  
424 mildly acidic environment. In our investigation, the level of such nontryptic activities was  
425 proportional to the reconstitution/storage period. We demonstrated that the level of  
426 nonspecific cleavages, however, could be minimized to 1% simply by using HPLC-grade  
427 water for reconstitution. Besides Trypsin-1, several other commercial trypsins exhibited  
428 markedly compromised specificity when stored under conditions recommended by the  
429 manufacturer, potentially resulting in lack of reproducibility and sensitivity in LC-MS/MS–  
430 based research and applications. Based on our results, we recommend reevaluation of the  
431 recommended reconstitution of trypsins with 50 mM acetic acid. Our adoption of NPD  
432 analysis for the identification of semitryptic and nontryptic peptides enabled the demographic  
433 investigation of residues that were accountable for increased rates of nonspecific cleavages,  
434 whereby Tyr, Phe, Trp, and Leu were found to be the preferred sites involved in nontryptic  
435 activities.

436

## 437 **Supporting Information**

438 **Fig S1.** Overlay of ultraviolet chromatograms of trypsin-digested monoclonal antibody A,  
439 using trypsin reconstituted in 1 mM HCl, 50 mM acetic acid, and high-performance liquid  
440 chromatography (HPLC)–grade water. The peak profiles of the digestion with trypsins  
441 reconstituted in acid were highly similar to, but different from, those with trypsin reconstituted  
442 in water. Nonspecific cleavages were significantly higher with acetic acid reconstitution. The  
443 dashed-line boxes indicate selected regions in which additional peaks corresponding to  
444 nonspecific cleavages arose.

445 **Fig S2.** (A) Total ion current chromatograms corresponding to the tryptic digestion of a 17-  
446 kDa protein with trypsin reconstituted in HPLC-grade water (upper panel) and 1 mM HCl  
447 (lower panel). The two visible new peaks (shaded in blue) were identified as peptides 30–48  
448 and 91–110 from nontryptic cleavages at W48 and Tyr110, respectively. (B) Extracted ion  
449 chromatograms of peptides 30–48 and 91–110, showing the dramatic increase in nontryptic  
450 cleavages that occurred when 1 mM HCl was used for trypsin reconstitution.

451 **Fig S3.** (A) New peak detection analysis designated 121 species as “new,” based on the  
452 predefined peak selection criteria. The apex retention time of each species versus the  
453 corresponding monoisotopic  $m/z$  is plotted. (B) Mass distribution of 58 peptides deconvoluted  
454 from the 121 species. Approximately 50% of peptides had masses ranging from 1,200 to 1,800  
455 Da.

456 **Fig S4.** Box plot showing the fold-change values in abundance for all identified semitryptic  
457 and nontryptic peptides. Although all peptides showed fold-change values of a minimum of 3,

458 nontryptic peptides demonstrated more significant fold-change values than did semitryptic  
459 peptides.

460 **Fig S5.** Assessment of the extent of missed cleavages showed that the level of missed  
461 cleavages ranged from 4% to 7% for all conditions.

462

463 **Acknowledgments**

464 The authors thank Chunlei Wang, Xiaoyu Chen, Sophie Inman, Jared Delmar, Meagan  
465 Prophet, Kevin Wons for providing input and discussion in this work. Editorial support was  
466 provided by Deborah Shuman of AstraZeneca.

467 **Author contributions**

468 **Sample treatment and preparation:** Ben Niu, Michael Martinelli II, Yang Jiao

469 **Data curation:** Ben Niu

470 **Investigation and discussion:** Ben Niu, Michael Martinelli II, Yang Jiao, Jihong Wang,  
471 Mingyan Cao, Eric Meinke

472 **Writing:** Ben Niu

## 473 **References**

- 474 1. Cao M, Xu W, Niu B, Kabundi I, Luo H, Prophet M, et al. An Automated and Qualified  
475 Platform Method for Site-Specific Succinimide and Deamidation Quantitation Using Low-pH  
476 Peptide Mapping. *J Pharm Sci.* 2019;108(11):3540-9. Epub 2019/08/03. doi:  
477 10.1016/j.xphs.2019.07.019. PubMed PMID: 31374319.
- 478 2. Hustoft H, Malerod H, Wilson S, Reubsaet L, Lundanes E, Greibrokk T. A Critical  
479 Review of Trypsin Digestion for LC-MS Based Proteomics. 2012.
- 480 3. Niu B, Appleby TC, Wang R, Morar M, Voight J, Villasenor AG, et al. Protein  
481 Footprinting and X-ray Crystallography Reveal the Interaction of PD-L1 and a Macrocyclic  
482 Peptide. *Biochemistry.* 2020;59(4):541-51. Epub 2019/12/17. doi:  
483 10.1021/acs.biochem.9b00822. PubMed PMID: 31841311.
- 484 4. Olsen JV, Ong SE, Mann M. Trypsin cleaves exclusively C-terminal to arginine and lysine  
485 residues. *Mol Cell Proteomics.* 2004;3(6):608-14. Epub 2004/03/23. doi:  
486 10.1074/mcp.T400003-MCP200. PubMed PMID: 15034119.
- 487 5. Switzar L, Giera M, Niessen WM. Protein digestion: an overview of the available  
488 techniques and recent developments. *J Proteome Res.* 2013;12(3):1067-77. Epub 2013/02/02.  
489 doi: 10.1021/pr301201x. PubMed PMID: 23368288.
- 490 6. Vandermarliere E, Mueller M, Martens L. Getting intimate with trypsin, the leading  
491 protease in proteomics. *Mass Spectrom Rev.* 2013;32(6):453-65. Epub 2013/06/19. doi:  
492 10.1002/mas.21376. PubMed PMID: 23775586.
- 493 7. Alves G, Yu Y-K. Improving peptide identification sensitivity in shotgun proteomics by  
494 stratification of search space. *Journal of proteome research.* 2013;12(6):2571-81. Epub  
495 2013/05/29. doi: 10.1021/pr301139y. PubMed PMID: 23668635.

- 496 8. Alves P, Arnold RJ, Clemmer DE, Li Y, Reilly JP, Sheng Q, et al. Fast and accurate  
497 identification of semi-tryptic peptides in shotgun proteomics. *Bioinformatics*. 2008;24(1):102-  
498 9. Epub 2007/11/24. doi: 10.1093/bioinformatics/btm545. PubMed PMID: 18033797.
- 499 9. Nigam A, Subramanian M, Koiram Rajanna P. Non-specific Digestion Artifacts of Bovine  
500 Trypsin Exemplified with Surrogate Peptides for Endogenous Protein Quantitation.  
501 *Chromatographia*. 2018;81(1):57-64. doi: 10.1007/s10337-017-3424-x.
- 502 10. Strader MB, Tabb DL, Hervey WJ, Pan C, Hurst GB. Efficient and specific trypsin  
503 digestion of microgram to nanogram quantities of proteins in organic-aqueous solvent  
504 systems. *Anal Chem*. 2006;78(1):125-34. Epub 2005/12/31. doi: 10.1021/ac051348l. PubMed  
505 PMID: 16383319.
- 506 11. Konig S, Zeller M, Peter-Katalinic J, Roth J, Sorg C, Vogl T. Use of nonspecific cleavage  
507 products for protein sequence analysis as shown on calyculin isolated from human  
508 granulocytes. *J Am Soc Mass Spectrom*. 2001;12(11):1180-5. Epub 2001/11/27. doi:  
509 10.1016/S1044-0305(01)00300-2. PubMed PMID: 11720393.
- 510 12. Sergeant K, Pinheiro C, Hausman JF, Ricardo CP, Renaut J. Taking advantage of  
511 nonspecific trypsin cleavages for the identification of seed storage proteins in cereals. *J*  
512 *Proteome Res*. 2009;8(6):3182-90. Epub 2009/04/23. doi: 10.1021/pr801093f. PubMed  
513 PMID: 19382796.
- 514 13. Lowenthal MS, Liang Y, Phinney KW, Stein SE. Quantitative bottom-up proteomics  
515 depends on digestion conditions. *Anal Chem*. 2014;86(1):551-8. Epub 2013/12/04. doi:  
516 10.1021/ac4027274. PubMed PMID: 24294946.

- 517 14. Perutka Z, Sebela M. Pseudotrypsin: A Little-Known Trypsin Proteoform. *Molecules*.  
518 2018;23(10). Epub 2018/10/17. doi: 10.3390/molecules23102637. PubMed PMID: 30322187;  
519 PubMed Central PMCID: PMC6222510.
- 520 15. Bongers J, Cummings JJ, Ebert MB, Federici MM, Gledhill L, Gulati D, et al. Validation  
521 of a peptide mapping method for a therapeutic monoclonal antibody: what could we possibly  
522 learn about a method we have run 100 times? *J Pharm Biomed Anal*. 2000;21(6):1099-128.  
523 Epub 2000/03/09. doi: 10.1016/s0731-7085(99)00181-8. PubMed PMID: 10708395.
- 524 16. Rogers RS, Abernathy M, Richardson DD, Rouse JC, Sperry JB, Swann P, et al. A View  
525 on the Importance of "Multi-Attribute Method" for Measuring Purity of Biopharmaceuticals  
526 and Improving Overall Control Strategy. *AAPS J*. 2017;20(1):7. Epub 2017/12/02. doi:  
527 10.1208/s12248-017-0168-3. PubMed PMID: 29192343.
- 528 17. Rogers RS, Nightlinger NS, Livingston B, Campbell P, Bailey R, Balland A. Development  
529 of a quantitative mass spectrometry multi-attribute method for characterization, quality control  
530 testing and disposition of biologics. *MAbs*. 2015;7(5):881-90. Epub 2015/07/18. doi:  
531 10.1080/19420862.2015.1069454. PubMed PMID: 26186204; PubMed Central PMCID:  
532 PMC4623056.
- 533 18. Zhang Z, Shah B, Guan X. Reliable LC-MS Multiattribute Method for Biotherapeutics by  
534 Run-Time Response Calibration. *Anal Chem*. 2019;91(8):5252-60. Epub 2019/03/28. doi:  
535 10.1021/acs.analchem.9b00027. PubMed PMID: 30916552.
- 536 19. Chamrad I, Strouhal O, Rehulka P, Lenobel R, Sebela M. Microscale affinity purification  
537 of trypsin reduces background peptides in matrix-assisted laser desorption/ionization mass  
538 spectrometry of protein digests. *J Proteomics*. 2011;74(7):948-57. Epub 2011/02/25. doi:  
539 10.1016/j.jprot.2011.02.011. PubMed PMID: 21345391.

- 540 20. Carpenter FH. Treatment of trypsin with TPCK. In: Grossman L, Moldave K, editors.  
541 Methods in Enzymology. Vol. 11. Cambridge, MA: Academic Press; 1967. p. 237-55.
- 542 21. Mouchahoir T, Schiel JE. Development of an LC-MS/MS peptide mapping protocol for  
543 the NISTmAb. Anal Bioanal Chem. 2018;410(8):2111-26. Epub 2018/02/08. doi:  
544 10.1007/s00216-018-0848-6. PubMed PMID: 29411091; PubMed Central PMCID:  
545 PMC5830484.
- 546 22. Burkhardt JM, Schumbrutzki C, Wortelkamp S, Sickmann A, Zahedi RP. Systematic and  
547 quantitative comparison of digest efficiency and specificity reveals the impact of trypsin  
548 quality on MS-based proteomics. J Proteomics. 2012;75(4):1454-62. Epub 2011/12/15. doi:  
549 10.1016/j.jprot.2011.11.016. PubMed PMID: 22166745.
- 550 23. Loziuk PL, Wang J, Li Q, Sederoff RR, Chiang VL, Muddiman DC. Understanding the  
551 role of proteolytic digestion on discovery and targeted proteomic measurements using liquid  
552 chromatography tandem mass spectrometry and design of experiments. J Proteome Res.  
553 2013;12(12):5820-9. Epub 2013/10/23. doi: 10.1021/pr4008442. PubMed PMID: 24144163.
- 554 24. Bern M, Kil YJ, Becker C. Byonic: advanced peptide and protein identification software.  
555 Curr Protoc Bioinformatics. 2012;Chapter 13:Unit13.20. Epub 2012/12/21. doi:  
556 10.1002/0471250953.bi1320s40. PubMed PMID: 23255153; PubMed Central PMCID:  
557 PMC3545648.
- 558 25. Kim JS, Monroe ME, Camp DG, Smith RD, Qian WJ. In-source fragmentation and the  
559 sources of partially tryptic peptides in shotgun proteomics. J Proteome Res. 2013;12(2):910-6.  
560 Epub 2012/12/28. doi: 10.1021/pr300955f. PubMed PMID: 23268687; PubMed Central  
561 PMCID: PMC3584699.



- 562 26. Fang P, Liu M, Xue Y, Yao J, Zhang Y, Shen H, et al. Controlling nonspecific trypsin  
563 cleavages in LC-MS/MS-based shotgun proteomics using optimized experimental conditions.  
564 *Analyst*. 2015;140(22):7613-21. Epub 2015/09/30. doi: 10.1039/c5an01505g. PubMed PMID:  
565 26418741.
- 566 27. Picotti P, Aebersold R, Domon B. The implications of proteolytic background for shotgun  
567 proteomics. *Mol Cell Proteomics*. 2007;6(9):1589-98. Epub 2007/05/30. doi:  
568 10.1074/mcp.M700029-MCP200. PubMed PMID: 17533221.
- 569 28. Keil-Dlouha VV, Zylber N, Imhoff J, Tong N, Keil B. Proteolytic activity of  
570 pseudotrypsin. *FEBS Lett*. 1971;16(4):291-5. Epub 1971/09/01. doi: 10.1016/0014-  
571 5793(71)80373-3. PubMed PMID: 11945964.
- 572 29. Smith RL, Shaw E. Pseudotrypsin: a modified bovine trypsin produced by limited  
573 autodigestion. *J Biol Chem*. 1969;244(17):4704-12. Epub 1969/09/10. PubMed PMID:  
574 5817636.
- 575 30. Dycka F, Franc V, Frycak P, Raus M, Rehulka P, Lenobel R, et al. Evaluation of  
576 Pseudotrypsin Cleavage Specificity Towards Proteins by MALDI-TOF Mass Spectrometry.  
577 *Protein Pept Lett*. 2015;22(12):1123-32. Epub 2015/10/09. doi:  
578 10.2174/0929866522666151008151617. PubMed PMID: 26446562.

579

580

581

582

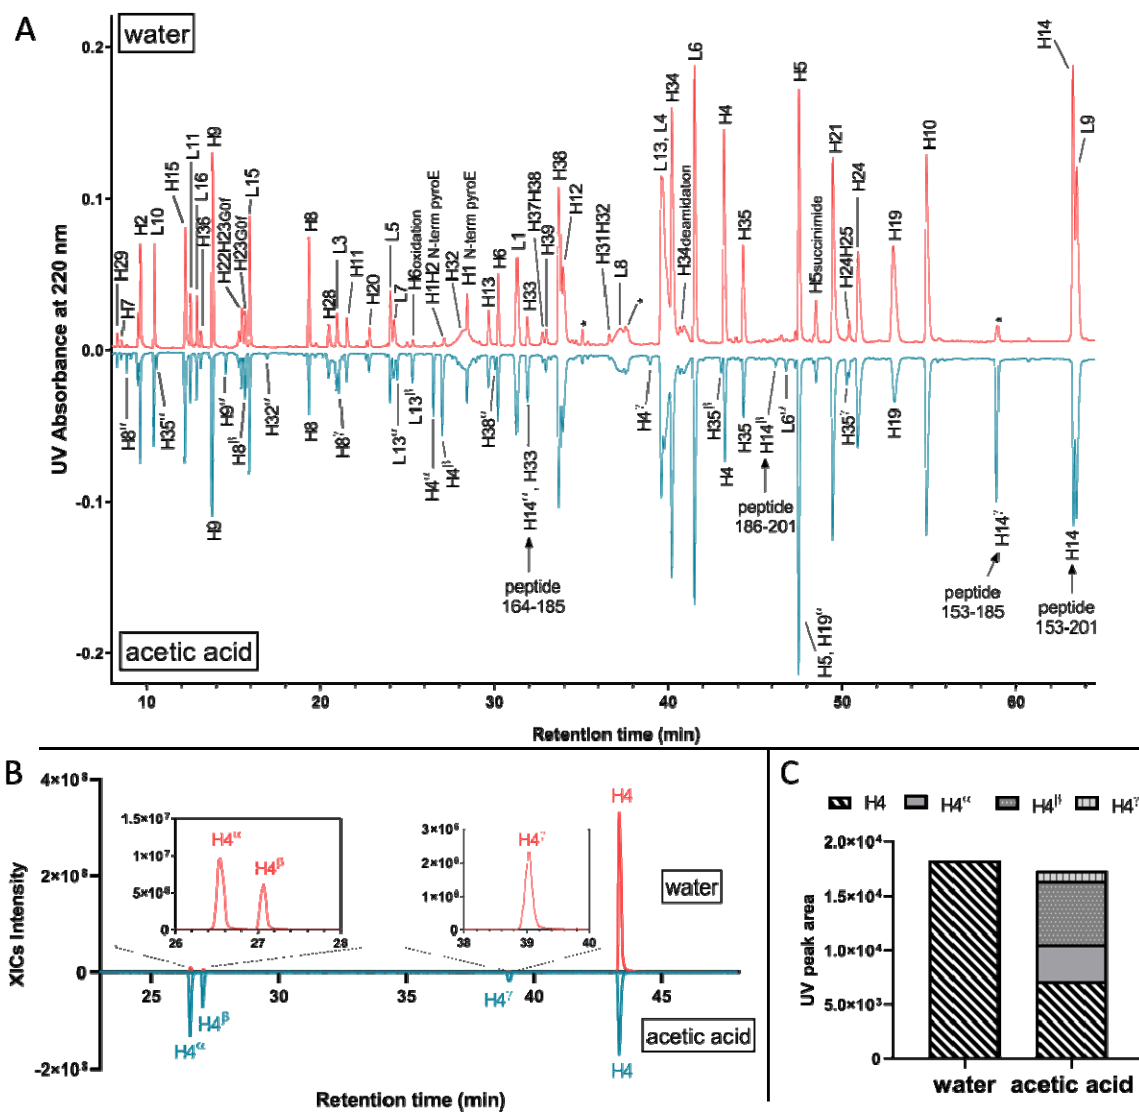

583

584 **Fig 1.** (A) Butterfly plot of UV chromatograms of mAb-A digested with Trypsin-1  
 585 reconstituted in HPLC-grade water and 50 mM acetic acid. Tryptic peptides are  
 586 denoted using single letters (H = heavy chain; L = light chain) followed by the  
 587 corresponding peptide number. Semitryptic and nontryptic peptides are denoted using  
 588 the corresponding fully tryptic peptides that encompass their sequences, followed by  
 589 Greek letters. Peaks annotated with asterisks are from autolysis. (B) Extracted ion  
 590 chromatograms (XICs) of peptide H4 and the semitryptic peptides H4<sup>α</sup>, H4<sup>β</sup>, and H4<sup>γ</sup>.  
 591 The abundances of semitryptic species were significantly higher when acetic acid was

592 used for reconstitution. (C) UV peak integrals representing peptide H4 and the  
593 corresponding semitryptic peptides H4 $\alpha$ , H4 $\beta$ , and H4 $\gamma$  showed that the sum of  
594 integrals between the two conditions were similar; however, H4 $\alpha$ , H4 $\beta$ , and H4 $\gamma$   
595 emerged in the acetic acid condition, at the cost of H4 signals.

596

597

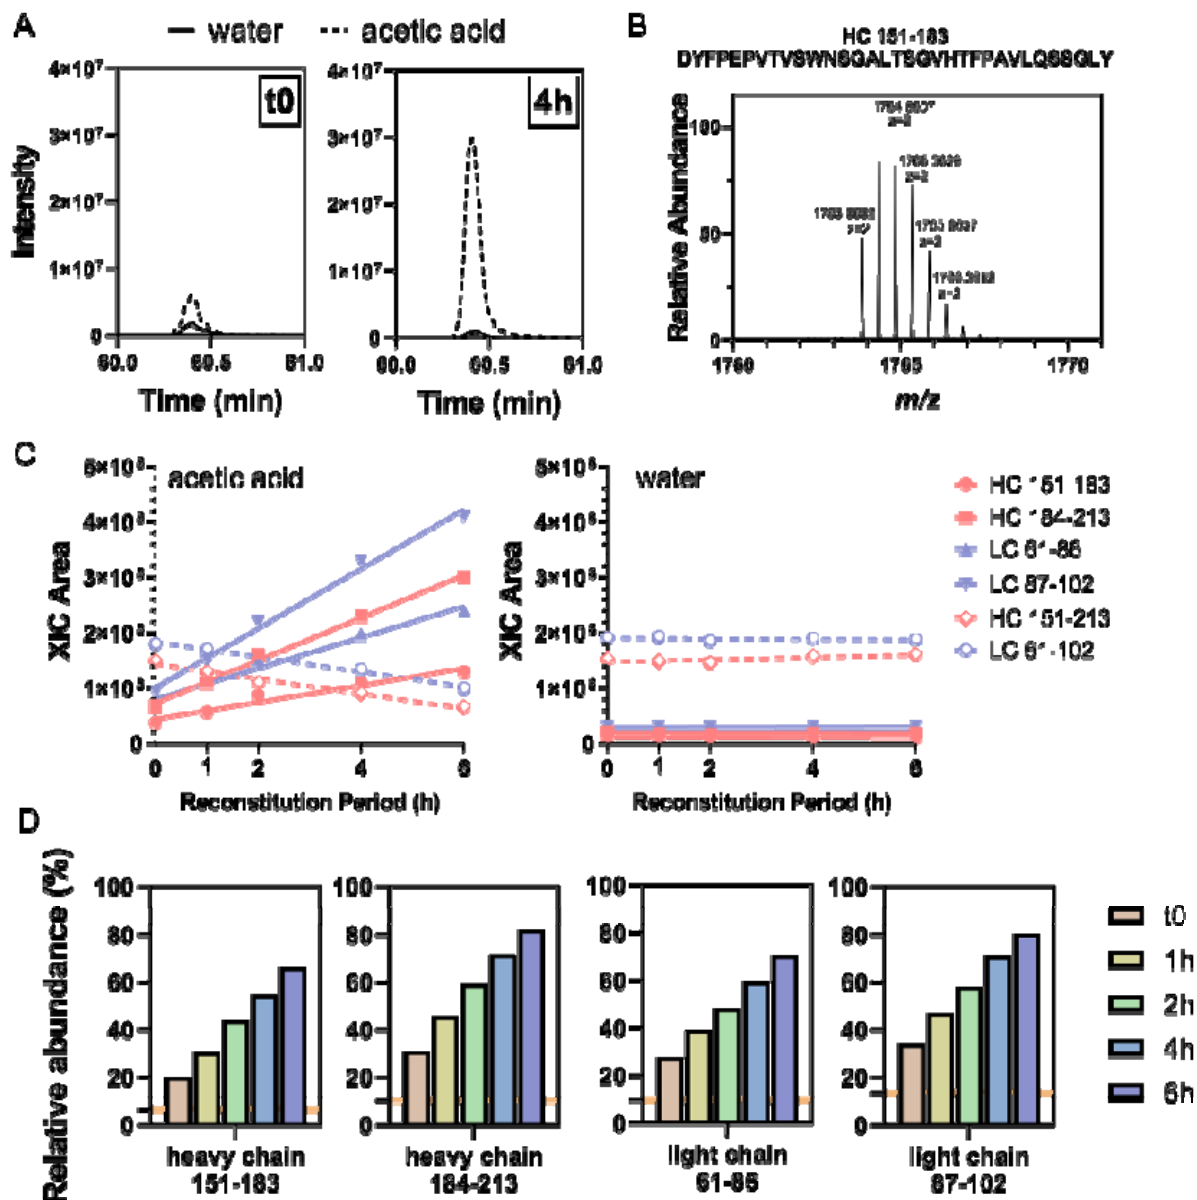

598

599

600

601

602

603

604

**Fig 2.** (A) XICs of NISTmAb peptide heavy chain 151–183 by monoisotopic mass ( $m/z$  1763.8582) showed increased intensity with reconstitution in 50 mM acetic acid compared with reconstitution in water. The difference in XIC intensity between the two reconstitution conditions was more pronounced with the 4-h reconstitution period. (B) Precursor-ion spectrum of NISTmAb peptide heavy chain 151–183 ( $z = 2$ ), a semitryptic peptide generated from nontryptic cleavage at Y183. (C) When 50 mM

605 acetic acid was used for Trypsin-1 reconstitution, all four semitryptic peptides showed  
606 increasing abundances with longer reconstitution times of up to 6 h, and the  
607 corresponding two fully tryptic peptides showed decreasing abundances. With water as  
608 the reconstitution condition, the abundances of all peptides remained unchanged, and  
609 those of the four semitryptic peptides were consistently low. (D) Abundances of the  
610 four semitryptic peptides relative to their corresponding fully tryptic peptides as a  
611 function of length of reconstitution period. Orange horizontal line indicates the  
612 corresponding averaged relative abundances of each peptide with reconstitution in  
613 water.

614

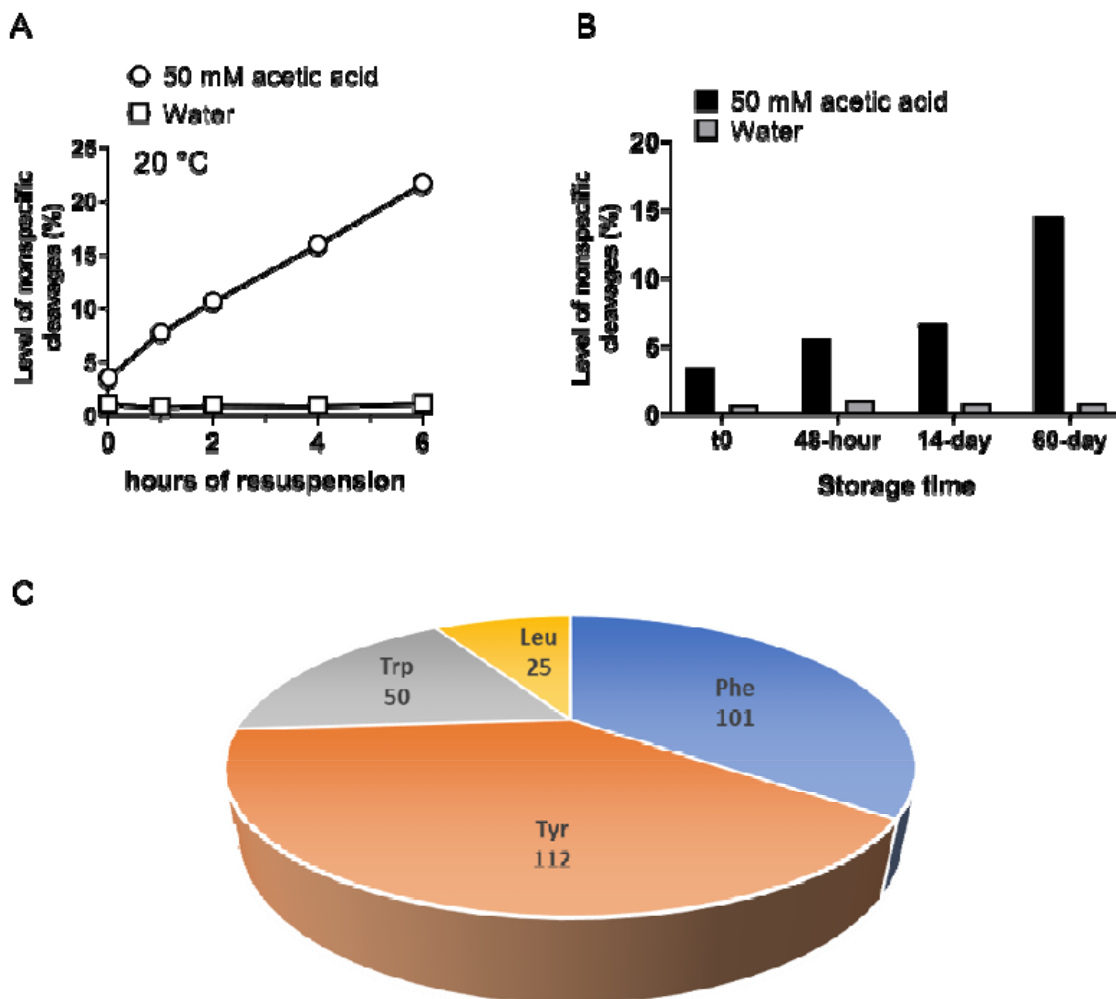

615

616 **Fig 3.** (A) Level of nonspecific cleavages as represented by the sum of XICs of the 52  
617 NISTmAb semitryptic peptides and 6 nontryptic peptides relative to the sum of total  
618 identified peptides XICs as a function of trypsin resuspension time at room  
619 temperature (20°C). Dramatic differences were observed between the two conditions  
620 (i.e., 50 mM acetic acid and water); reconstitution in the acidic condition caused more  
621 nontryptic cleavages, the extent of which increased with longer reconstitution times. In  
622 contrast, the level of nonspecific cleavages remained consistent at approximately 1%  
623 with reconstitution of trypsin in water. (B) Evaluation of level of Trypsin-1  
624 nonspecific cleavages under the recommended storage condition, with trypsin

625 reconstituted in 50 mM acetic acid and stored at  $-80^{\circ}\text{C}$  for different periods, versus  
626 the storage condition using water for reconstitution. The yield of nonspecific cleavages  
627 under the recommended storage condition (50 mM acetic acid) was significantly  
628 higher and increased with the length of the storage period. (C) Demographic profile of  
629 amino acids involved in the semitryptic and nontryptic cleavages, based on 220  
630 semitryptic peptides and 34 nontryptic peptides involving five biotherapeutic samples  
631 in addition to NISTmAb.

632

633

634

635

636

637

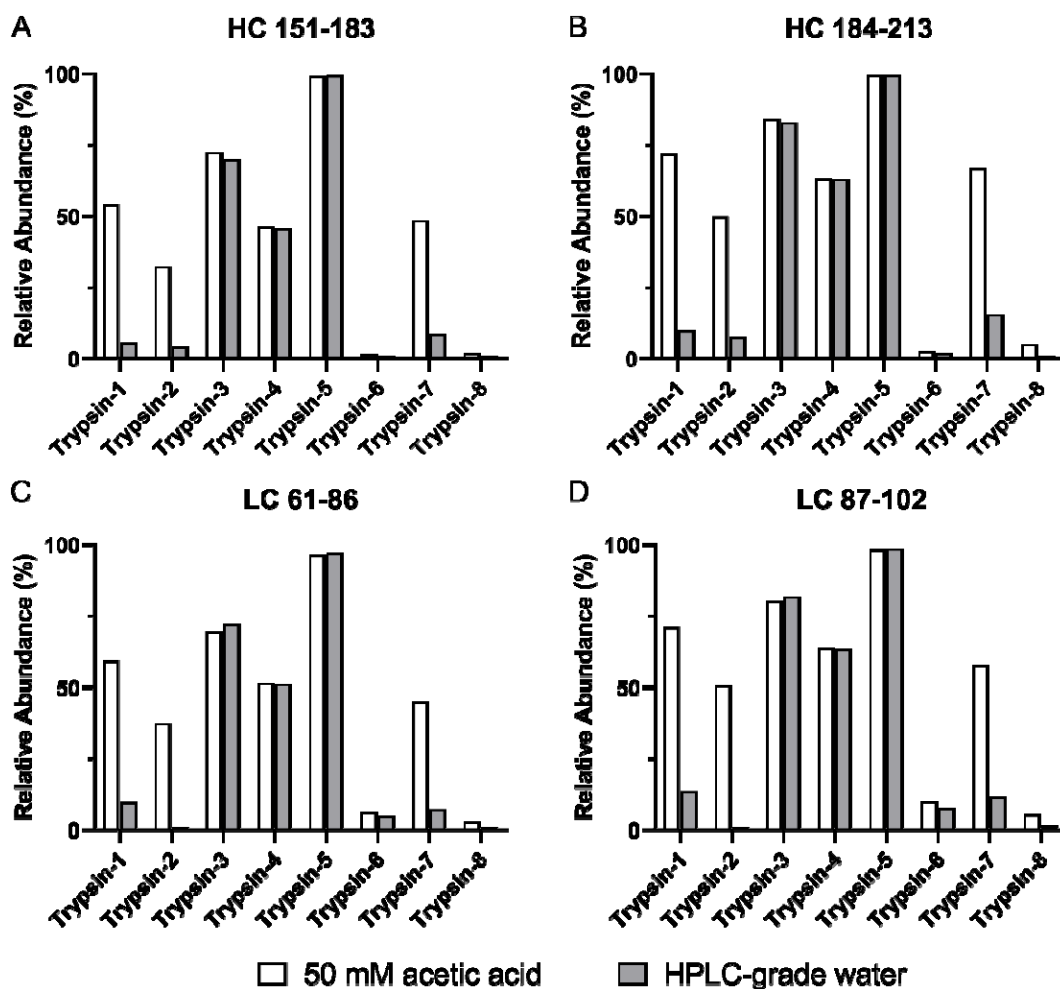

638

639

**Fig 4.** Relative abundance of selected NISTmAb semitryptic peptides for evaluation of

640

nonspecific cleavages. Shown are (A) heavy chain 151–183, (B) heavy chain 184–213,

641

(C) light chain 61-86, and (D) light chain 87–102, as generated from tryptic digestion

642

with eight commercial trypsins (Trypsin-1 to Trypsin-8). Each trypsin was

643

reconstituted in 50 mM acetic acid (white bar) and HPLC-grade water (gray bar) at

644

room temperature for 4 h before immediate use for digestion.

645

646
